# Supplementary material for: Phenotype screens of murine pancreatic cancer identify a Tgf-α-Ccl2-paxillin axis driving human-like neural invasion
Source: JCI journal article supplement (doi:10.1172/jci166333), 2023-08-22
Supplement: sd1 [file 1]

301 Moved Permanently

# Moved Permanently

The document has moved here.
